# Supplementary material
Source: Research Square preprint supplement (doi:10.21203/rs.3.rs-9584999/v1)
Supplement: Supplementary file 1 [file b0f72f1fa1d55f1112d30729.docx]

**Supporting information**

Dual-Ion Pre-intercalation in Intralayer and Interlayer Sites for Enhanced Ammonium-Ion Storage Performance of MnO2

*Ting Xiao1,2,*,Yiwen Zhang1, Can Tang2, Yuting Mei1, Xiuru Li1, Yulong Qiao2, Lihua Jiang1, Shibing Ni1, Yequan Xiao1 and Xinyu Tan1, 3,**

1 Hubei Provincial Engineering Research Center for Solar Energy High-value Utilization and Green Conversion, Key Laboratory of Inorganic Nonmetallic Crystalline and Energy Conversion Materials, College of Materials and Chemical Engineering, China Three Gorges University, Yichang 443002, PR China.

2 Hubei Provincial Engineering Technology Research Center for Microgrid, College of Electrical Engineering & New Energy, China Three Gorges University, Yichang 443002, PR China

3 School of New Energy, Jingchu University of Technology, Jingmen 448000, PR China

*Corresponding Author Email: [tingxiao@ctgu.edu.cn](mailto:tingxiao@ctgu.edu.cn); [tanxin@ctgu.edu.cn](mailto:tanxin@ctgu.edu.cn)

**1. Electrochemical performance calculation**

Based on GCD curves, the areal specific capacitances of the as-synthesized electrodes were calculated according to the equation S1:

(S1)

where Cg (F g-1) is the specific capacitance of the working electrode, I (A) is the discharge current, *Δt* (s) is the total discharge time for one complete cycle, *ΔV* (V) is the voltage window during the reaction, and m (g) is the mass of the electrode material involved in the reaction.

For the fabrication of ASC device, areal capacitance (Ccell, F cm-2), energy density (E, mWh cm-2) and power density (P, mW cm-2) of device were calculated from current charging/discharging curves using the following equations, respectively.

(S2)

(S3)

(S4)

where I, S, Δt, ΔV are the discharge current (A), area of the device (cm2), discharge time (s), and voltage window (V) of the discharge process, respectively.

1. **Characterization**

Powder X-ray diffraction (XRD, Rigaku SmartLab Cu Kα radiation λ=1.5406 Å) was used to analyze composition of the electrodes. Field-emission scanning electron microscopy (FE-SEM, JSM 7500F) and transmission electron microscope (TEM, Tecnai, G220 UTWIN) were used to observe micromorphology of the electrodes. X-ray photoelectron spectroscopy (XPS) were performed on a PHI Quantera II spectrometer to characterize the chemical composition and valence state information.

1. **Electrochemical Measurements**

The electrochemical performance was tested using Shanghai Chenhua's 760e instrument. The performance of a single electrode was measured using three electrodes, in which the prepared sample (MnO2, Mo-MnO2 or Mo-MnO2/AC) was the working electrode, the saturated calomel electrode (SCE) was the reference electrode, the platinum sheet electrode was the counter electrode, and 1 M CH3COONH4 solution was the electrolyte. The performance of the device was tested using a two-electrode system, with Mo-MnO2/AC (1.0 cm×1.0 cm) materials as the positive electrode and the ACC (1.0 cm×1.0 cm) as the negative electrode.

1. **Supplementary figures**


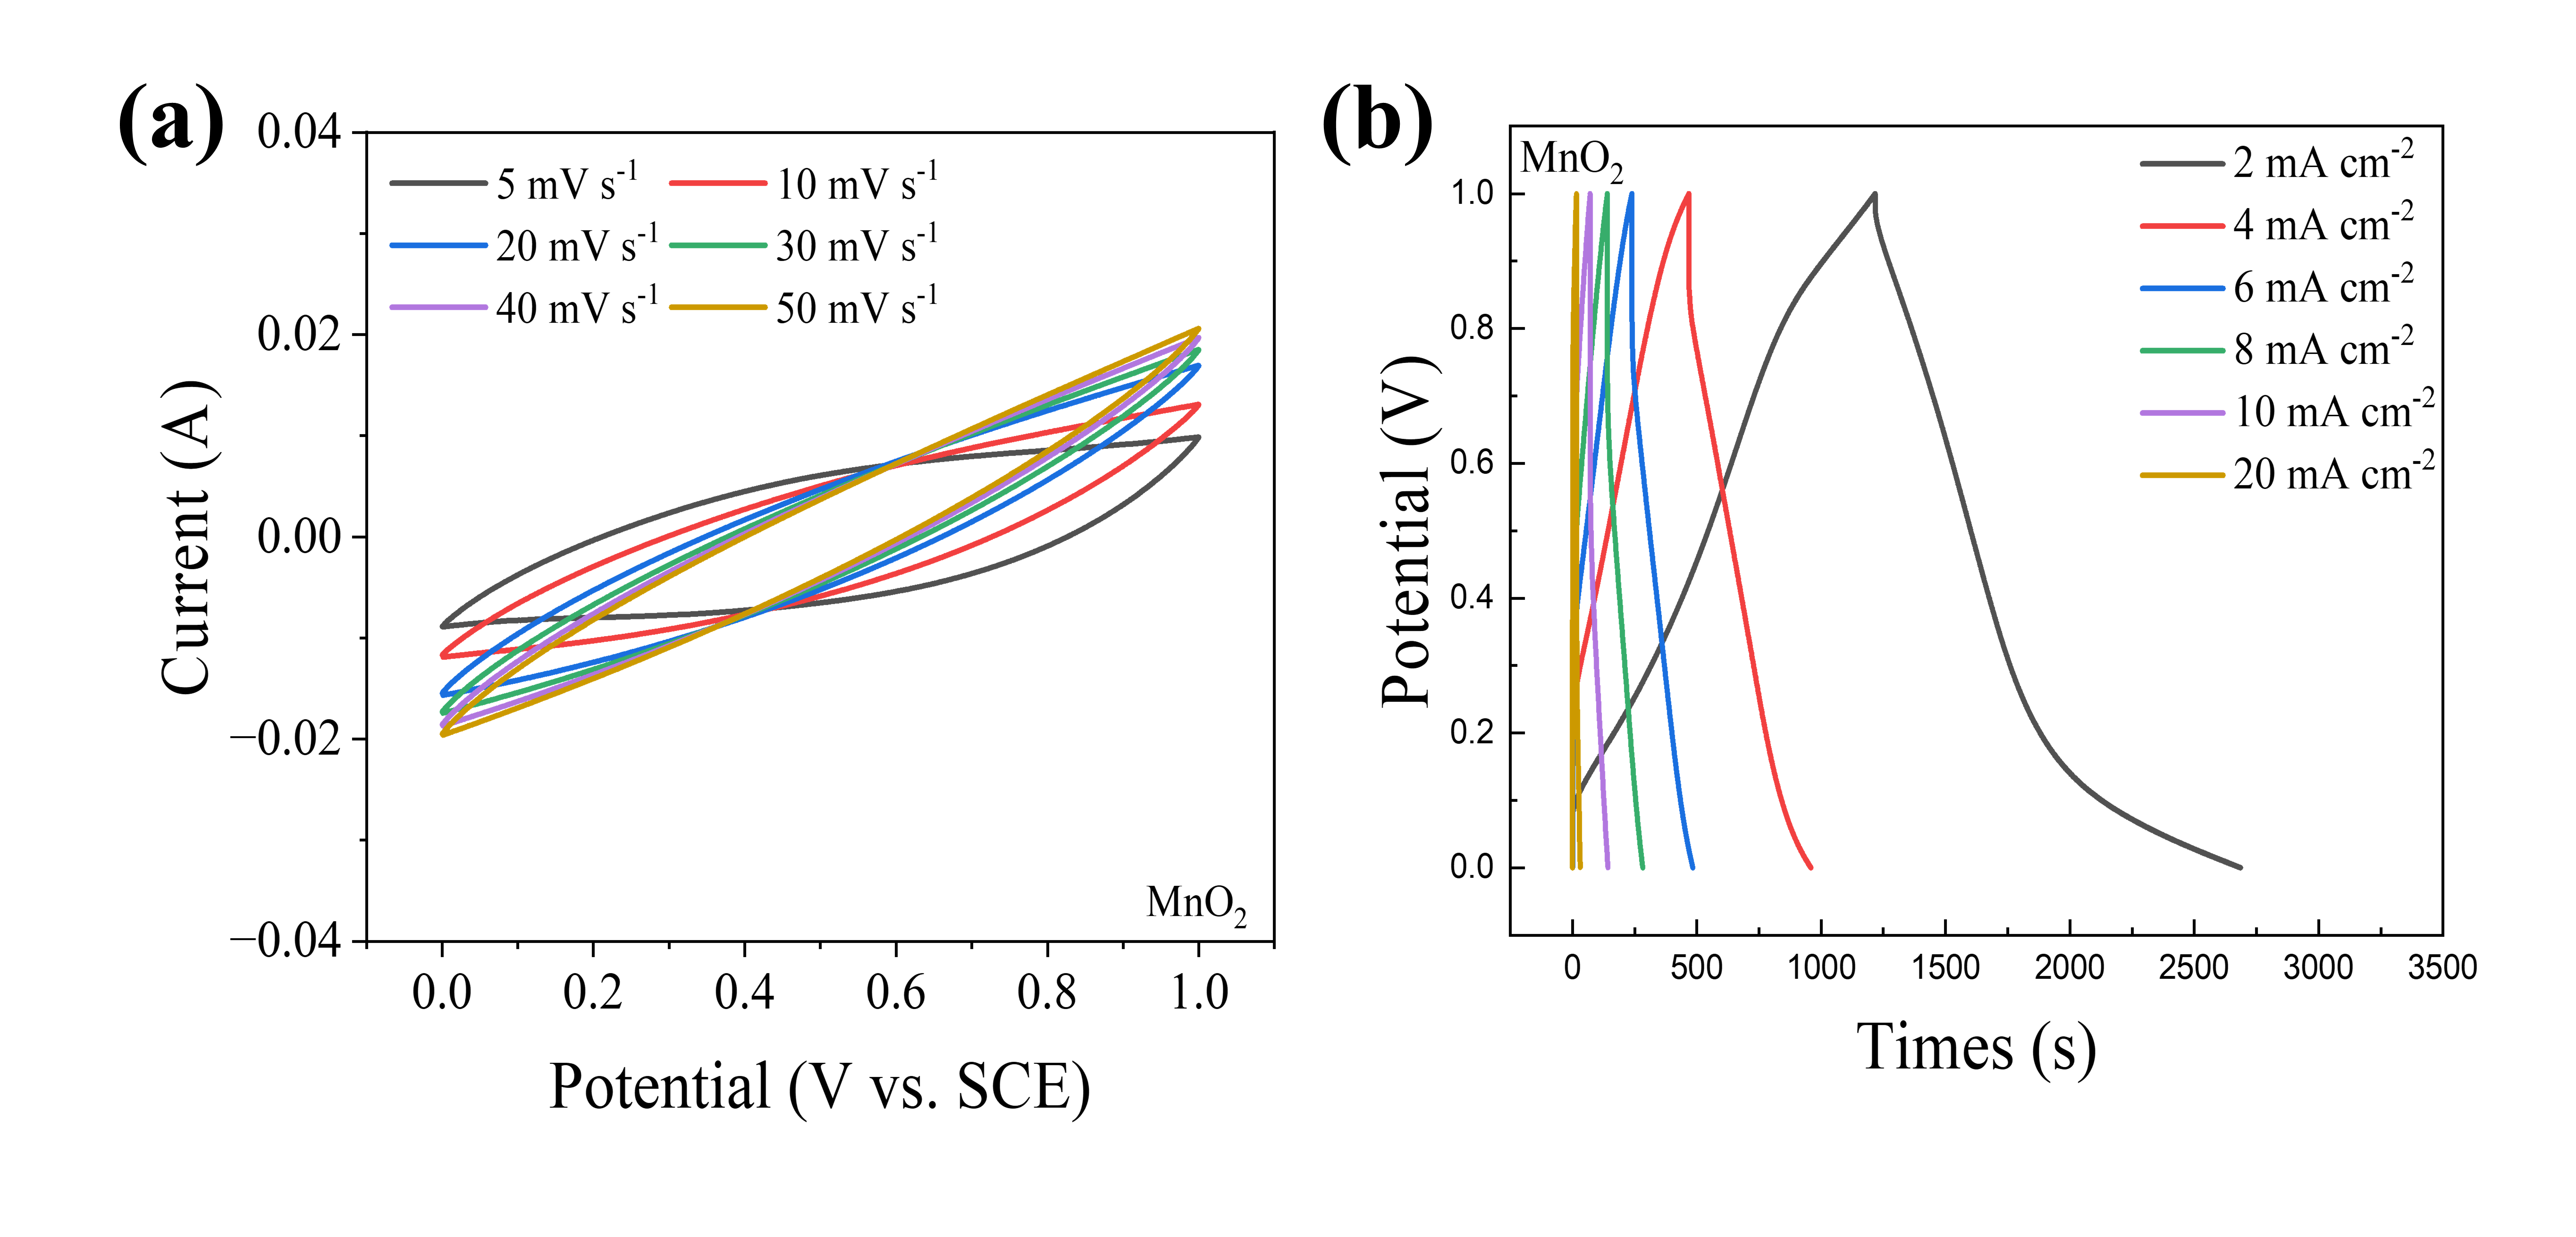


**Fig. S1.** (a)CV curves of the MnO2 anode at 5−50 mV s−1. (b) GCD curves of MnO2 sample at 2−20 mA cm−2


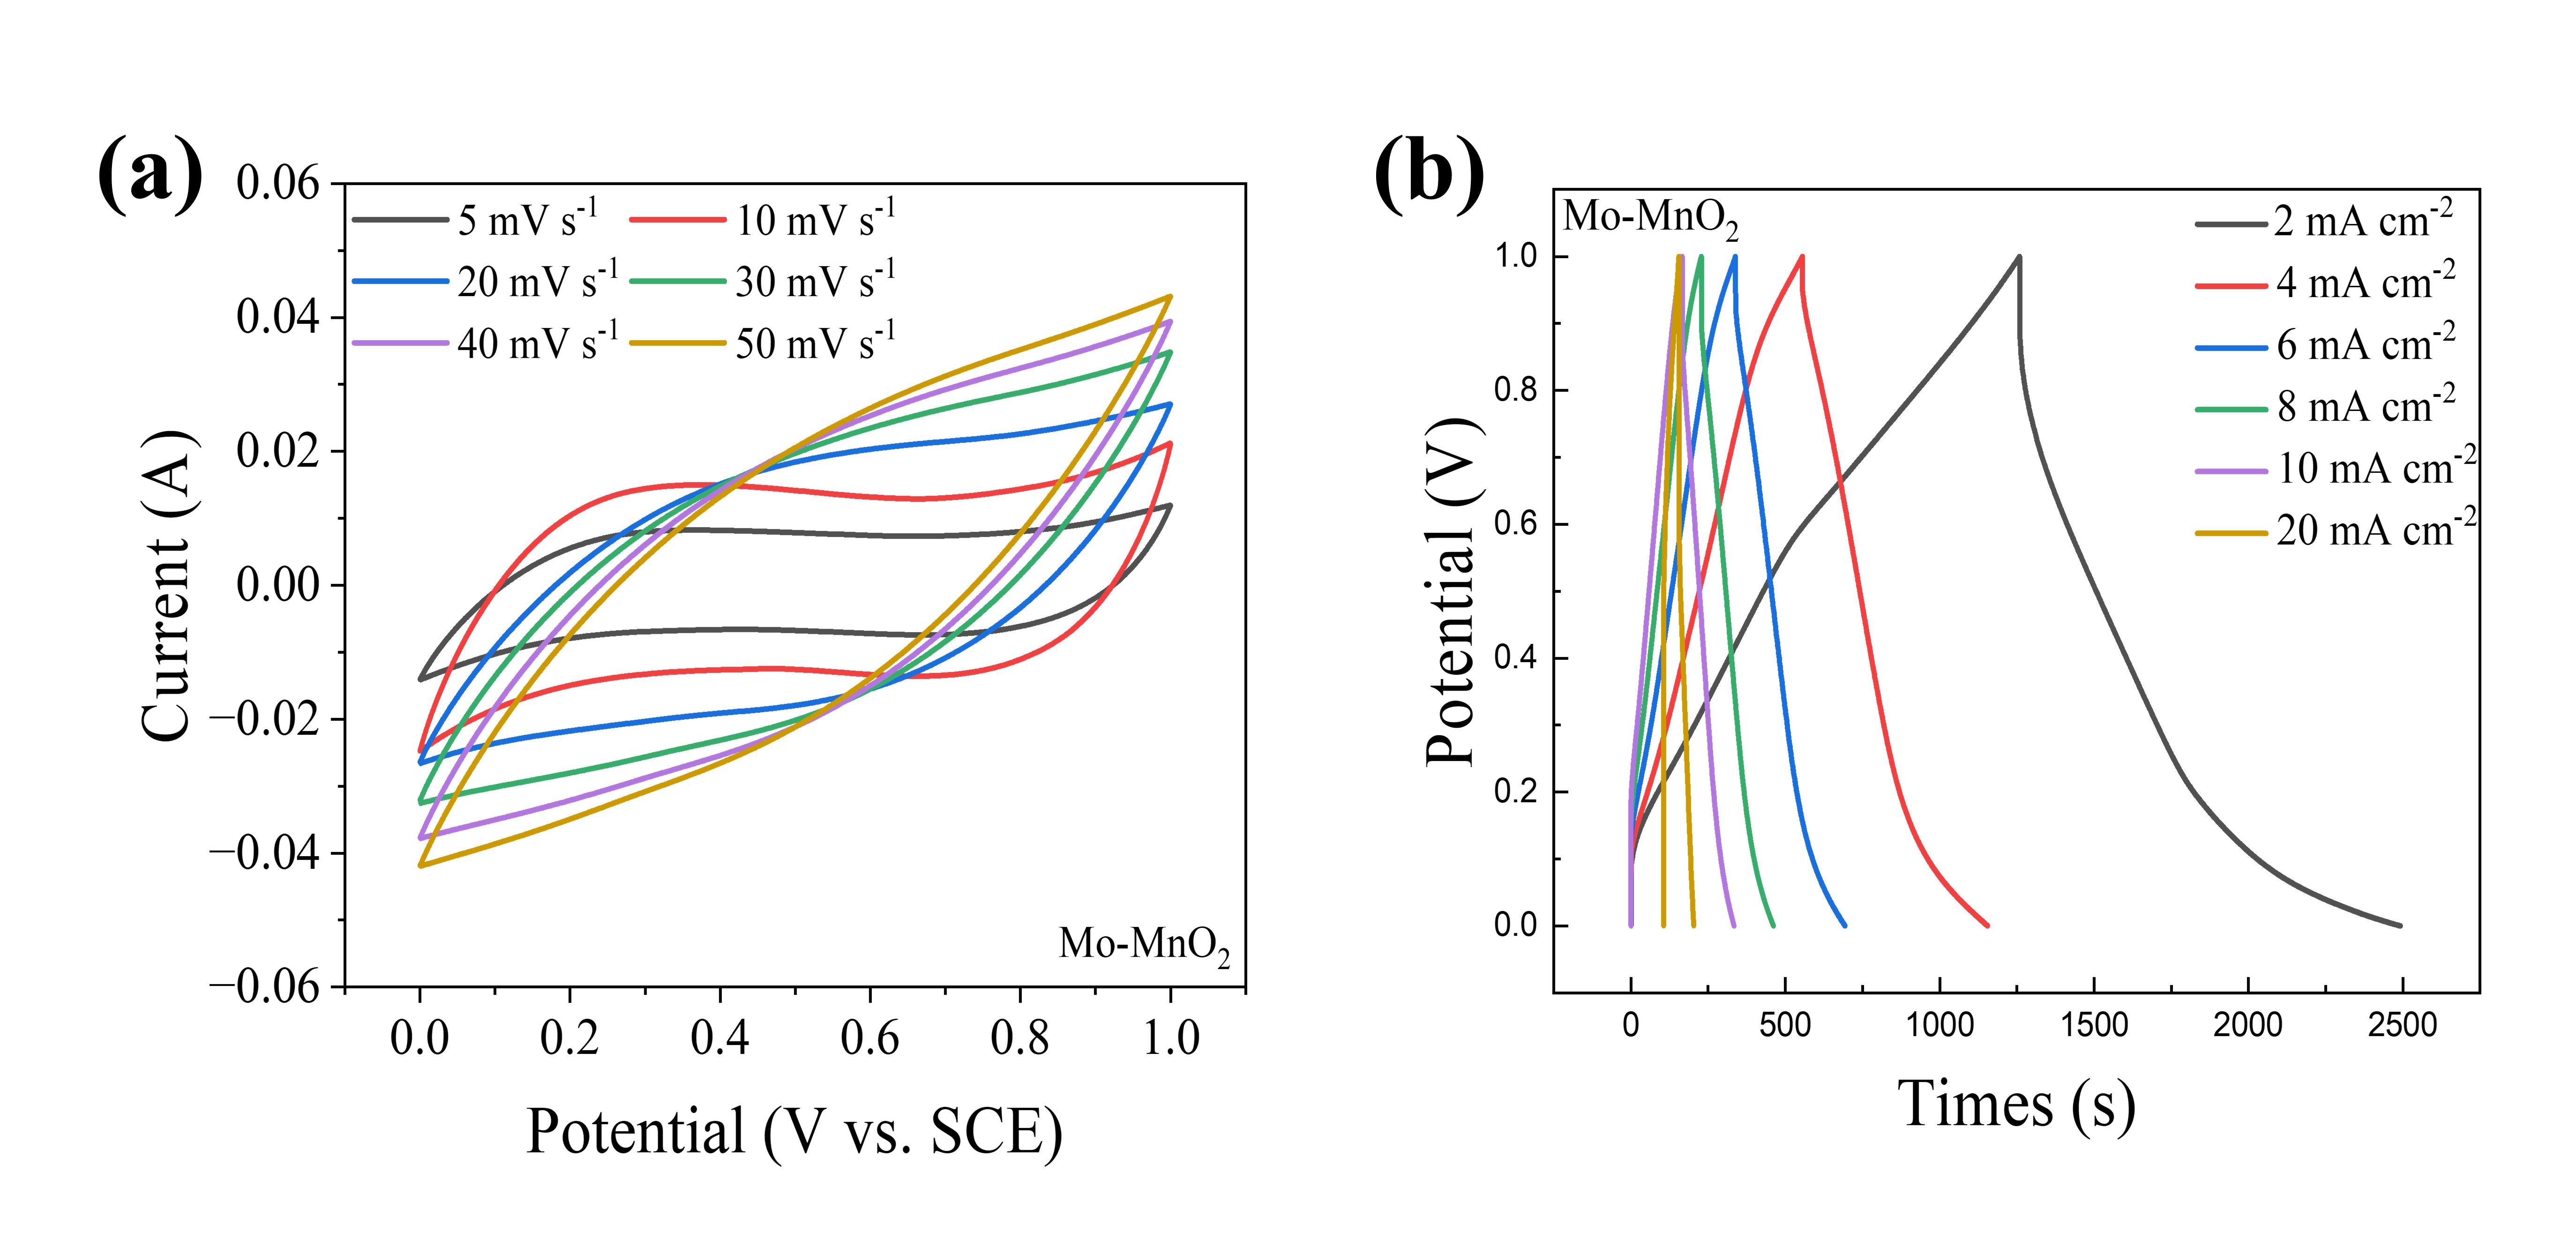


**Fig. S2.** (a)CV curves of the Mo-MnO2 anode at 5−50 mV s−1. (b) GCD curves of Mo-MnO2 sample at 2−20 mA cm−2


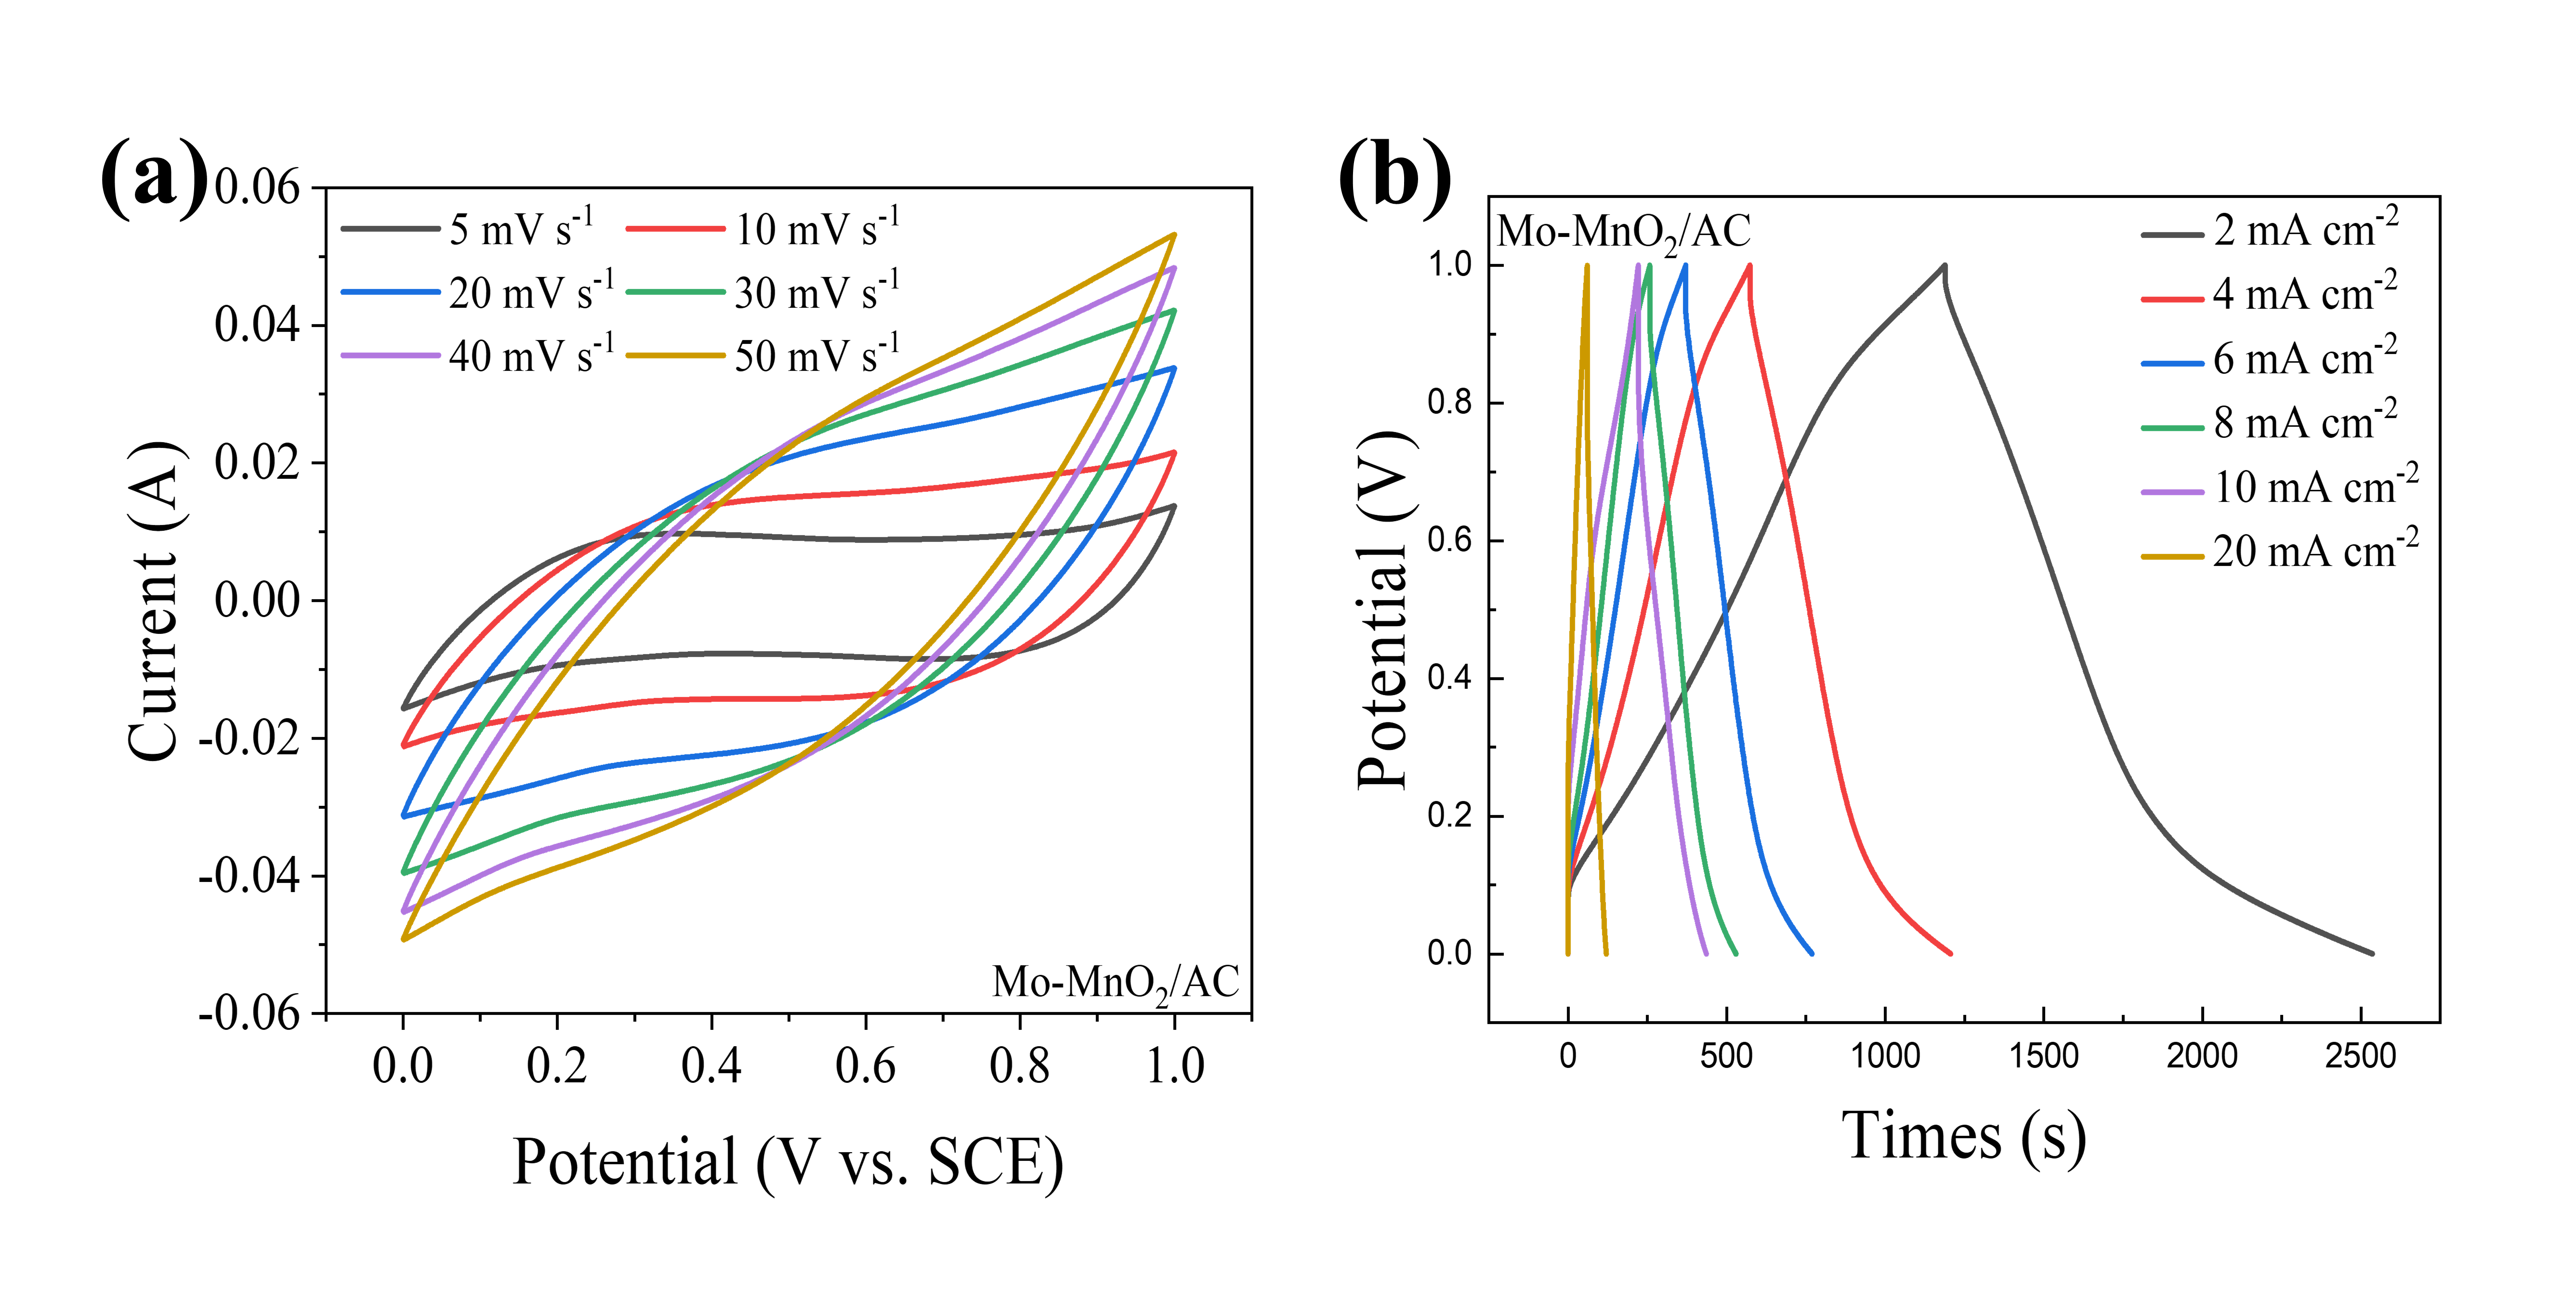


**Fig. S3.** (a)CV curves of the Mo-MnO2/AC anode at 5−50 mV s−1.
